# Supplementary material
Source: publisher figshare collection journal article supplement (https://sage.figshare.com/ndownloader/files/36299355)
Supplement: Supplementary file 1 [file 36299355]

**Supplemental material**

| Supplemental table 1: Brain imaging findings | | | | |
| --- | --- | --- | --- | --- |
|  | **AF self-terminated**  **n=87** | **AF converted**  **n=143** | **AF non-converted**  **n=67** | ***p*-value** |
| *Stroke location* |  |  |  | 0.803 |
| Entire Middle Cerebral Artery | 32 (36.8) | 50 (35.0) | 31 (46.3) |  |
| Middle Cerebral Artery upper division | 14 (16.1) | 23 (16.1) | 9 (13.4) |  |
| Middle Cerebral Artery lower division | 14 (16.1) | 23 (16.1) | 8 (11.9) |  |
| Deep Middle Cerebral Artery | 10 (11.5) | 19 (13.3) | 12 (17.9) |  |
| Posterior Cerebral artery | 8 (9.2) | 12 (8.4) | 3 (4.5) |  |
| Cerebellum and posterior locations | 9 (10.3) | 16 (11.2) | 4 (6.0) |  |
| Insular involvement | 58 (66.7) | 88 (61.5) | 47 (70.1) | 0.440 |
| Hemorrhagic transformation | 14 (16.1) | 33 (23.1) | 14 (20.9) | 0.444 |
| Brain edema | 20 (23.3) | 22 (15.4) | 16 (23.9) | 0.210 |

| Supplemental Table 2: Cumulative Probability (%) of outcomes in acute stroke patients according to Paroxysmal Atrial Fibrillation conversion | | | | |
| --- | --- | --- | --- | --- |
|  | Self-terminated  n=87 | Converted by medications  n=143 | Non converted  n=67 | *p* |
| *Mortality* |  |  |  |  |
| 3 months | 13.8 (6.5-13.8) | 11.9 (6.6-17.2) | 23.9 (10.2-34.1) | 0.057 |
| 1 year | 21.5 (12.7-30.3) | 20.5 (9.3-27.4) | 41.2 (28.9-53.5) | 0.004 |
| 5 years | 47.1 (39.5-59.3) | 42.9 (36.9-52.1) | 60.6 (47.1-74.1) | 0.010 |
| 10 years | 66.8 (52.9-80.7) | 62.6 (51.7-72.8) | 79.8 (66.7-92.9) | 0.009 |
|  |  |  |  |  |
| *Stroke Recurrence* |  |  |  |  |
| 3 months | 2.6 (0.0-6.1) | 6.8 (2.5-11.1) | 8.5 (1.4-15.6) | 0.260 |
| 1 year | 7.3 (1.0-13.6) | 10.6 (5.1-16.1) | 11.3 (2.5-20.1) | 0.558 |
| 5 years | 16.5 (6.1-26.9) | 20.2 (11.8-28.2) | 38.8 (18.6-59.0) | 0.146 |
| 10 years | 31.9 (10.5-53.3) | 34.6 (13.3-55.9) | 60.6 (36.7-84.5) | 0.064 |
|  |  |  |  |  |
| *MACE* |  |  |  |  |
| 3 months | 5.2 (0.3-10.1) | 8.3 (3.6-13.0) | 16.3 (7.1-25.5) | 0.041 |
| 1 year | 12.8 (5.0-20.6) | 14.9 (8.4-21.4) | 23.2 (11.8-34.6) | 0.126 |
| 5 years | 25.0 (12.9-31.6) | 26.8 (18.0-35.6) | 49.9 (36.7-68.1) | 0.018 |
| 10 years | 38.1 (18.7-57.5) | 40.4 (27.3-53.5) | 74.2 (56.4-93.9) | 0.004 |
| Numbers in parentheses indicate 95% CI, p by log-rank test. | | | | |

| Supplemental Table 3: Time-point univariate cox analysis of outcomes | | | | |
| --- | --- | --- | --- | --- |
|  | 3 months  HR (95 CI) | 1 year  HR (95 CI) | 5 years  HR (95 CI) | 10 years  HR (95 CI) |
| Mortality |  |  |  |  |
| Non-converted (reference) | 1 | 1 | 1 | 1 |
| PAF converted | 0.46 (0.23-0.91)* | 0.45 (0.26-0.76)* | 0.53 (0.34-0.81)# | 0.56 (0.38-0.82)# |
| Self-terminated | 0.54 (0.26-1.14) | 0.48 (0.26-0.87)* | 0.60 (0.38-0.97)* | 0.66 (0.40-0.95)* |
| Stroke recurrence |  |  |  |  |
| Non-converted (reference) | 1 | 1 | 1 | 1 |
| PAF converted | 0.74 (0.25-2.21) | 0.86 (0.36-2.25) | 0.62 (0.30-1.26) | 0.58 (0.31-1.09) |
| Self-terminated | 0.27 (0.05-1.41) | 0.54 (0.16-1.77) | 0.44 (0.18-1.04) | 0.42 (0.19-0.91)* |
| MACE |  |  |  |  |
| Non-converted (reference) | 1 | 1 | 1 | 1 |
| PAF converted | 0.46 (0.20-1.08) | 0.58 (0.27-1.14) | 0.52 (0.29-0.92)* | 0.46 (0.29-0.82)# |
| Self-terminated | 0.28 (0.08-0.88)* | 0.46 (0.20-1.07) | 0.42 (0.21-0.86)* | 0.40 (0.21-0.76)# |
| *p<0.05, #p<0.01 | | | | |
